# Supplementary figures and images for: In Vitro Efficacy of Dalbavancin as an Anti-biofilm Long Acting Agent Loaded in Bone Cement
Source: Preprints.org preprint supplement (doi:10.20944/preprints202306.2198.v1), 2023-06-30

Supplementary Materials


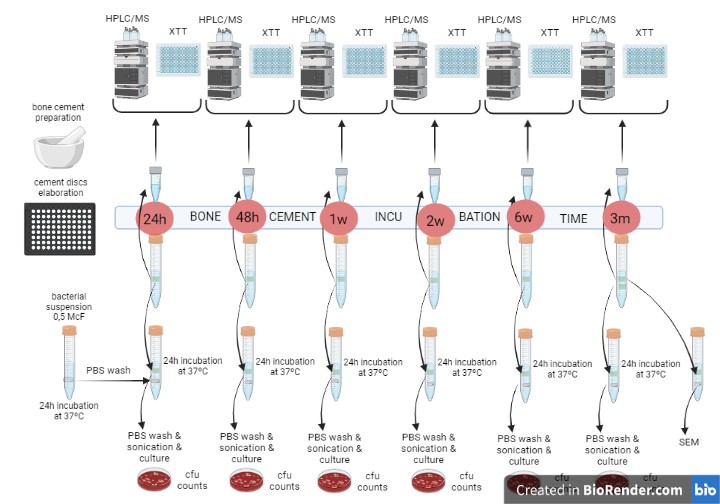


Figure S1: Laboratory procedure

Supplement: Supplementary file 3 [file supplementary]
